# Supplementary material
Source: PubMed Central journal article supplement (PMC9119287)
Supplement: NIHMS1739967-supplement-Supplementary_Data_S1.pdf [file NIHMS1739967-supplement-Supplementary_Data_S1.pdf]

# Web-based Supplementary Materials for “Estimating Individual-Level and Population-Level Causal Effects of Organ Transplantation Treatment Regimes” by Jeffrey A. Boatman and David M. Vock

## 1 Web Appendix A. Notation

$T^*(\infty)$ : potential survival time from listing if a patient were to never receive a transplanted organ

$T^*(b, q)$ : potential survival time from listing if a patient received an organ  $b$  days after listing with organ characteristics  $q$

$\mathcal{Q}$ : the set of all donor characteristics

$X^*(b)$  the covariates collected  $b$  days after listing for a random patient including whether or not the patient had been previously transplanted and had previously died prior to time  $b$

$L_i$ : calendar date the  $i$ th patient is listed for organ transplantation

$N_{ij}^*(t, q)$ : indicator that patient died on the  $j$ th study day if she accepted an organ with characteristics  $q$ ,  $t$  days after listing

$Y_{ij}^*(t, q)$ : indicator that patient was at risk of death on the  $j$ th study day if she accepted an organ with characteristics  $q$ ,  $t$  days after listing

$N_{ij}^*(\infty)$ : indicator that patient died on the  $j$ th study day if she were to never receive a transplant

$Y_{ij}^*(\infty)$ : indicator that patient was at risk of death on the  $j$ th study day if she were to never receive a transplant

$g$ : a transplant regime dictating which organs should be avoided

$\mathcal{G}$ : the set of all possible treatment regimes

$T_i^*(g, g')$ : the time from listing a patient would live if she were to follow regime  $g$  and all other patients were to follow  $g'$

$B^{(g, g')}$ : time from listing until transplantation for a patient who follows regime  $g$  while all other patients follow regime  $g'$

$Q^{(g, g')}$ : vector of the transplanted organ characteristics for a patient who follows regime  $g$  while all other patients follow regime  $g'$

$\mathcal{P}_i$ : the set of potential outcomes for the  $i$ th patient

$f_{T^*(g, g')}(t)$ : the density of  $T^*(g, g')$

$f_{T^*(B, Q) | \bar{X}^*(b)}\{t | \bar{x}(b)\}$ : the conditional density of  $T^*(b, q)$

$\rho^{(g, g')}\{b, q | \bar{x}(b)\}$ : the probability of receiving a transplant  $b$  days after listing with organ characteristics  $q$  given she is untransplanted  $b - 1$  days after listing with covariate history  $\bar{x}(b)$  and the patient follows regime  $g$  while all others follow regime  $g'$

$f_{T, Q | \bar{X}^*(t)}^{(g, g')}\{t, q | \bar{x}(t)\}$ : the probability of receiving a transplant  $t$  days after listing with organ characteristics  $q$  if the patient follows regime  $g$  while all others follow regime  $g'$

$f_{\bar{X}(b)}$ : the density of  $\bar{X}(b)$

$T_i$ : the observed time from entering the waiting list until death

$X_{ij}$ : the vector of covariates collected on the  $i$ th patient on the  $j$ th day

$N_{ij}$ : indicator for whether patient died on the  $j$ th study day

$Y_{ij}$ : indicator for whether patient was at risk for death on the  $j$ th study day

$S_j$ : number of organs available on the  $j$ th study day

$Q_{jk}$ : characteristics of the  $k$ th organ on the  $j$ th day

$A_{ijk}$ : indicator for whether the patient was transplanted with the  $k$ th organ on the  $j$ th day

$O_{ijk}$ : indicator for whether the patient was offered the  $k$ th organ on the  $j$ th day

$E_{ijk}$ : the collection of all information on the  $i$ th subject at the time of the  $k$ th transplant on the  $j$ th day but excluding whether the  $i$ th patient actually receives the  $k$ th organ

$E_{.jk}$ : the collection of information on all subjects  $i = 1, \dots, n$  prior to assigning the  $k$ th organ on the  $j$ th study day

$R_{ijk}$ : the rank of the  $i$ th patient on the waiting list for the  $k$ th organ on the  $j$ th day of the study

$D_{ijk}(g, E_{ijk})$ : indicator for whether or not the  $k$ th organ on day  $j$  should be avoided under regime  $g$  based on the organ and patient characteristics

$\pi_{ijk}^{A(g)}(E_{ijk})$ : the probability that the  $i$ th patient accepts the  $k$ th organ on the  $j$ th day if the patient is complying with or following regime  $g$ .

$\emptyset$ : the transplant regime where patients make no changes to their propensity to accept or decline organs

$\pi_{ijk}^{A(\emptyset)}(E_{ijk})$ : the probability that the  $i$ th patient accepts the  $k$ th organ on the  $j$ th day if the patient makes no changes to her organ acceptance policy.

$\pi_{ijk}^{O(g,g')}(E_{.jk})$ : the conditional probability the  $i$ th patient is offered the  $k$ th organ on day  $j$  given that she is following regime  $g$  and all other patients are following regime  $g'$

$\pi_{ijk}^{(g,g')}(a_{ijk}, E_{.jk})$ : the probability that  $i$ th person receives and does not receive if  $a_{ijk} = 1$  and  $a_{ijk} = 0$ , respectively, the  $k$ th available organ on the  $j$ th day given all information up until the time of assigning that organ, assuming the  $i$ th patient is following regime  $g$  and all other patients are following regime  $g'$ .

$\bar{\pi}_{ij}^{(g,g')}(\bar{a}_{ij}, \bar{E}_{jS_j})$ : the probability that the  $i$ th patient has her treatment history through study day  $j$  given that she is following regime  $g$  and all other patients follow regime  $g'$

$S_r(g, g')$ : the survival probability  $r$  days after entering the waiting list for following regime  $g$  while all other patients follow regime  $g'$

$\lambda_t(g, g')$ : the discrete-time hazard of death  $t$  days after entering the waiting list for a randomly selected patient if she were to following regime  $g$  and all other patients followed regime  $g'$

$\lambda_t^{PT}$ : the post-transplantation discrete-time hazard of death  $t$  days after transplantation

Web Table 1: Lung Quality Model Coefficient Estimates and 95% Confidence Intervals

| Coefficient                       | Estimate | 95% C.I.         |
|-----------------------------------|----------|------------------|
| Patient Age                       | -0.029   | (-0.041, -0.017) |
| Patient Age'                      | 0.041    | ( 0.026, 0.056)  |
| Patient Age''                     | -0.320   | (-0.566, -0.073) |
| Donor Age                         | 0.000    | (-0.017, 0.017)  |
| Donor Age'                        | -0.045   | (-0.143, 0.052)  |
| Donor Age''                       | 0.098    | (-0.069, 0.265)  |
| LAS                               | 0.049    | ( 0.015, 0.084)  |
| LAS'                              | -0.985   | (-1.846, -0.124) |
| LAS''                             | 1.565    | ( 0.175, 2.954)  |
| I(Donor Diabetes = Y)             | 0.257    | ( 0.103, 0.411)  |
| I(Disease Group = B)              | 0.204    | (-0.020, 0.427)  |
| I(Disease Group = C)              | -0.219   | (-0.433, -0.006) |
| I(Disease Group = D)              | -0.126   | (-0.253, 0.000)  |
| I(Single-Lung Transplant)         | 0.115    | ( 0.023, 0.207)  |
| I(Patient on Life Support)        | 0.441    | ( 0.278, 0.604)  |
| I(Donor Race = other)             | -0.199   | (-0.323, -0.074) |
| I(Donor Race = white)             | -0.269   | (-0.368, -0.170) |
| Patient-Donor Height Difference   | -0.003   | (-0.017, 0.011)  |
| Patient-Donor Height Difference'  | -0.024   | (-0.073, 0.026)  |
| Patient-Donor Height Difference'' | 0.104    | (-0.071, 0.280)  |
| Patient BMI                       | 0.012    | ( 0.002, 0.022)  |

Coefficient estimates from the Cox proportional hazards model used to estimate donor quality. Coefficients for the restricted cubic spline bases are indicated by ' and ''.

Web Table 2: Coefficients and 95% Confidence Intervals from Logistic Regression Model For Accepting a Transplantation.

| Coefficient                             | Estimate | 95% C.I.         |
|-----------------------------------------|----------|------------------|
| Intercept                               | 0.649    | (-0.190, 1.488)  |
| Current Age                             | -0.025   | (-0.034, -0.017) |
| Current Age'                            | 0.055    | ( 0.043, 0.067)  |
| Current Age''                           | -0.469   | (-0.583, -0.355) |
| LAS                                     | 0.029    | ( 0.006, 0.052)  |
| LAS'                                    | -0.046   | (-0.426, 0.334)  |
| LAS''                                   | 0.062    | (-0.587, 0.711)  |
| Days on Waiting List                    | -0.008   | (-0.009, -0.007) |
| Days on Waiting List'                   | 0.149    | ( 0.118, 0.179)  |
| Days on Waiting List''                  | -0.211   | (-0.255, -0.167) |
| Disease Group = B                       | -0.967   | (-1.099, -0.834) |
| Disease Group = C                       | -0.289   | (-0.414, -0.164) |
| Disease Group = D                       | -0.614   | (-0.686, -0.542) |
| Height Difference                       | 0.103    | ( 0.096, 0.111)  |
| Height Difference'                      | -0.317   | (-0.338, -0.295) |
| Height Difference''                     | 0.863    | ( 0.749, 0.976)  |
| I(Donor Smoker $\geq$ 20 pack-years)    | -0.227   | (-0.302, -0.151) |
| I(Donor Age > 50)                       | -1.669   | (-2.378, -0.961) |
| Current Age $\cdot$ I(Donor Age > 50)   | 0.028    | ( 0.007, 0.048)  |
| Current Age' $\cdot$ I(Donor Age > 50)  | -0.002   | (-0.034, 0.029)  |
| Current Age'' $\cdot$ I(Donor Age > 50) | 0.015    | (-0.266, 0.295)  |

Coefficient estimates from the logistic model used to estimate the probability of accepting an offered organ. Coefficients for the restricted cubic spline bases are indicated by ' and ''.
